# Supplementary material for: Efficacy and safety of 5 alpha-reductase inhibitor monotherapy in patients with benign prostatic hyperplasia: A meta-analysis
Source: PubMed Central journal article supplement (PMC6169865; doi:10.1371/journal.pone.0203479), 2018-10-03
Supplement: pone.0203479.s002.pdf [file pone.0203479.s002.pdf]

| Search | Add to builder      | Query                                                                             | Items found              |
|--------|---------------------|-----------------------------------------------------------------------------------|--------------------------|
| #47    | <a href="#">Add</a> | Search #37 NOT #40 Filters: <b>Publication date from 2015/01/01 to 2017/12/31</b> | <a href="#">31</a>       |
| #46    | <a href="#">Add</a> | Search #37 NOT #40                                                                | <a href="#">371</a>      |
| #40    | <a href="#">Add</a> | Search #38 OR #39                                                                 | <a href="#">2227158</a>  |
| #39    | <a href="#">Add</a> | Search <b>"review literature as topic"[MeSH Terms]</b>                            | <a href="#">9049</a>     |
| #38    | <a href="#">Add</a> | Search <b>"review"[Publication Type]</b>                                          | <a href="#">2219932</a>  |
| #37    | <a href="#">Add</a> | Search #23 AND #36                                                                | <a href="#">515</a>      |
| #36    | <a href="#">Add</a> | Search #31 NOT #35                                                                | <a href="#">994181</a>   |
| #35    | <a href="#">Add</a> | Search #32 NOT #34                                                                | <a href="#">4302930</a>  |
| #34    | <a href="#">Add</a> | Search #33 AND #32                                                                | <a href="#">16273795</a> |
| #33    | <a href="#">Add</a> | Search <b>humans[MeSH Terms]</b>                                                  | <a href="#">16273795</a> |
| #32    | <a href="#">Add</a> | Search <b>animals[MeSH Terms]</b>                                                 | <a href="#">20576725</a> |
| #31    | <a href="#">Add</a> | Search #24 OR #25 OR #26 OR #27 OR #28 OR #29 OR #30                              | <a href="#">1078841</a>  |
| #30    | <a href="#">Add</a> | Search <b>trial[Title]</b>                                                        | <a href="#">163115</a>   |
| #29    | <a href="#">Add</a> | Search <b>randomly[Title/Abstract]</b>                                            | <a href="#">267055</a>   |
| #28    | <a href="#">Add</a> | Search <b>"clinical trials as topic"[Mesh:noexp]</b>                              | <a href="#">178729</a>   |
| #27    | <a href="#">Add</a> | Search <b>placebo[Title/Abstract]</b>                                             | <a href="#">182580</a>   |
| #26    | <a href="#">Add</a> | Search <b>randomized[Title/Abstract]</b>                                          | <a href="#">402078</a>   |
| #25    | <a href="#">Add</a> | Search <b>"controlled clinical trial"[Publication Type]</b>                       | <a href="#">515779</a>   |
| #24    | <a href="#">Add</a> | Search <b>"randomized controlled trial"[Publication Type]</b>                     | <a href="#">429381</a>   |
| #23    | <a href="#">Add</a> | Search #13 AND #22                                                                | <a href="#">1760</a>     |
| #22    | <a href="#">Add</a> | Search #17 OR #21                                                                 | <a href="#">4111</a>     |
| #21    | <a href="#">Add</a> | Search #18 OR #19 OR #20                                                          | <a href="#">3055</a>     |
| #20    | <a href="#">Add</a> | Search <b>dutasteride[Title/Abstract]</b>                                         | <a href="#">671</a>      |
| #19    | <a href="#">Add</a> | Search <b>finasteride[Title/Abstract]</b>                                         | <a href="#">2265</a>     |
| #18    | <a href="#">Add</a> | Search <b>5-alpha Reductase Inhibitors[Title/Abstract]</b>                        | <a href="#">516</a>      |
| #17    | <a href="#">Add</a> | Search #14 OR #15 OR #16                                                          | <a href="#">3041</a>     |
| #16    | <a href="#">Add</a> | Search <b>dutasteride[Supplementary Concept]</b>                                  | <a href="#">472</a>      |
| #15    | <a href="#">Add</a> | Search <b>finasteride[MeSH Terms]</b>                                             | <a href="#">1959</a>     |
| #14    | <a href="#">Add</a> | Search <b>5-alpha Reductase Inhibitors[MeSH Terms]</b>                            | <a href="#">1759</a>     |
| #13    | <a href="#">Add</a> | Search #1 OR #12                                                                  | <a href="#">28335</a>    |
| #12    | <a href="#">Add</a> | Search #10 OR #11                                                                 | <a href="#">22160</a>    |
| #11    | <a href="#">Add</a> | Search <b>"BPH"[Title/Abstract]</b>                                               | <a href="#">9862</a>     |
| #10    | <a href="#">Add</a> | Search #4 AND #9                                                                  | <a href="#">19993</a>    |
| #9     | <a href="#">Add</a> | Search #5 OR #6 OR #7 OR #8                                                       | <a href="#">207490</a>   |
| #8     | <a href="#">Add</a> | Search <b>Adenoma[Title/Abstract]</b>                                             | <a href="#">43703</a>    |
| #7     | <a href="#">Add</a> | Search <b>Adenomas[Title/Abstract]</b>                                            | <a href="#">31081</a>    |
| #6     | <a href="#">Add</a> | Search <b>Hypertrophy[Title/Abstract]</b>                                         | <a href="#">75812</a>    |
| #5     | <a href="#">Add</a> | Search <b>Hyperplasia[Title/Abstract]</b>                                         | <a href="#">79856</a>    |
| #4     | <a href="#">Add</a> | Search #2 OR #3                                                                   | <a href="#">170911</a>   |
| #3     | <a href="#">Add</a> | Search <b>Prostate[Title/Abstract]</b>                                            | <a href="#">151686</a>   |
| #2     | <a href="#">Add</a> | Search <b>Prostatic[Title/Abstract]</b>                                           | <a href="#">48914</a>    |
| #1     | <a href="#">Add</a> | Search <b>Prostatic Hyperplasia[MeSH Terms]</b>                                   | <a href="#">19749</a>    |
