# Supplementary material for: Efficacy and safety of 5 alpha-reductase inhibitor monotherapy in patients with benign prostatic hyperplasia: A meta-analysis
Source: PubMed Central journal article supplement (PMC6169865; doi:10.1371/journal.pone.0203479), 2018-10-03
Supplement: pone.0203479.s003.pdf [file pone.0203479.s003.pdf]

|     |                                                                   |                                                                                       |       |
|-----|-------------------------------------------------------------------|---------------------------------------------------------------------------------------|-------|
| #1  | MeSH descriptor: [Prostatic Hyperplasia] explode all trees        |      | 1536  |
| #2  | Prostatic:ab,ti                                                   |    | 3310  |
| #3  | Prostate:ab,ti                                                    |    | 9875  |
| #4  | #2 or #3                                                          |    | 11202 |
| #5  | Hyperplasia:ab,ti                                                 |    | 3125  |
| #6  | Hypertrophy:ab,ti                                                 |    | 2483  |
| #7  | Adenomas:ab,ti                                                    |    | 919   |
| #8  | Adenoma:ab,ti                                                     |    | 1169  |
| #9  | #5 or #6 or #7 or #8                                              |    | 7102  |
| #10 | #4 and #9                                                         |    | 2087  |
| #11 | "BPH":ab,ti                                                       |    | 1188  |
| #12 | #10 or #11                                                        |    | 2239  |
| #13 | #1 or #12                                                         |    | 2532  |
| #14 | MeSH descriptor: [5-alpha Reductase Inhibitors] explode all trees |    | 202   |
| #15 | MeSH descriptor: [Finasteride] explode all trees                  |    | 319   |
| #16 | MeSH descriptor: [Dutasteride] explode all trees                  |   | 120   |
| #17 | #14 or #15 or #16                                                 |  | 458   |
| #18 | 5-alpha Reductase Inhibitors:ab,ti                                |  | 60    |
| #19 | finasteride:ab,ti                                                 |  | 484   |
| #20 | dutasteride:ab,ti                                                 |  | 232   |
| #21 | #18 or #19 or #20                                                 |  | 705   |
| #22 | #17 or #21                                                        |  | 744   |

|     |                                                                     |    |        |
|-----|---------------------------------------------------------------------|----|--------|
| #23 | #13 and #22                                                         | TH | 369    |
| #24 | randomized controlled trial:pt (Word variations have been searched) | S  | 418842 |
| #25 | controlled clinical trial:pt (Word variations have been searched)   | S  | 312498 |
| #26 | randomized:ab,ti                                                    | TH | 371754 |
| #27 | placebo:ab,ti                                                       | TH | 179382 |
| #28 | MeSH descriptor: [Clinical Trials as Topic] explode all trees       | M  | 57213  |
| #29 | randomly:ab,ti                                                      | TH | 148564 |
| #30 | trial:ti                                                            | TH | 187569 |
| #31 | #24 or #25 or #26 or #27 or #28 or #29 or #30                       | TH | 769921 |
| #32 | MeSH descriptor: [Animals] explode all trees                        | M  | 7971   |
| #33 | MeSH descriptor: [Humans] explode all trees                         | M  | 1457   |
| #34 | #33 and #32                                                         | TH | 1457   |
| #35 | #32 not #34                                                         | TH | 6514   |
| #36 | #31 not #35                                                         | TH | 763538 |
| #37 | #23 and #36                                                         | TH | 327    |
| #38 | review:pt (Word variations have been searched)                      | S  | 6472   |
| #39 | MeSH descriptor: [Review Literature as Topic] explode all trees     | M  | 163    |
| #40 | #38 or #39                                                          | TH | 6633   |
| #41 | #37 not #40                                                         | TH | 23     |

Publication Year from 2015 to 2017
